# Supplementary material
Source: PubMed Central journal article supplement (PMC5610570)

**A**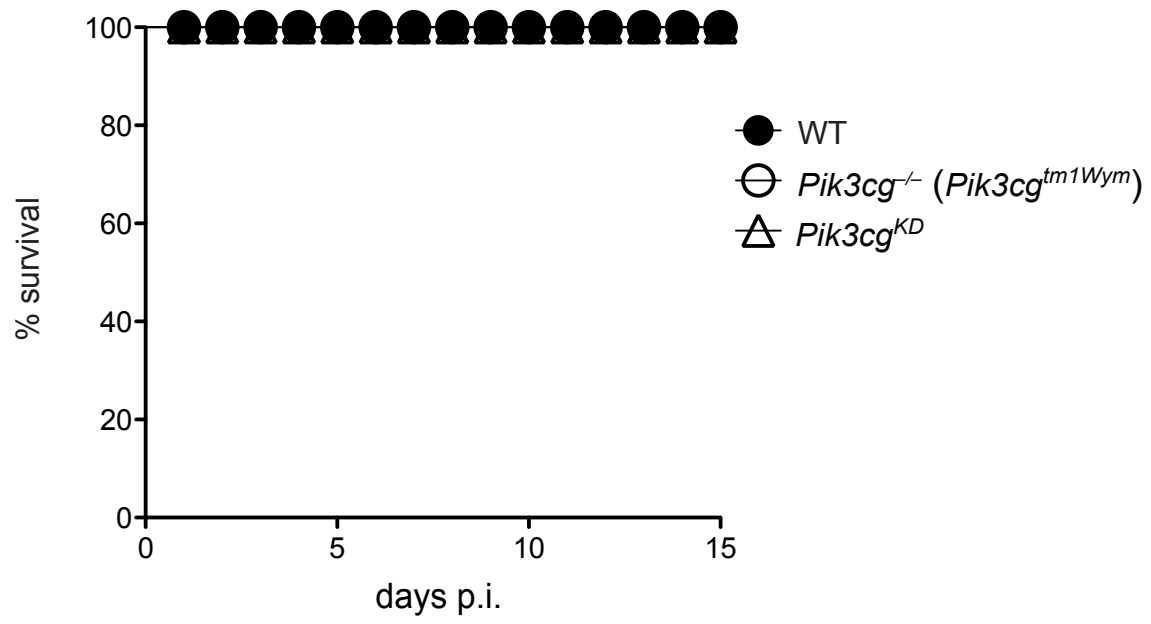

Supplement: NIHMS74117-supplement-Supplementary_Figure_2.pdf [file NIHMS74117-supplement-Supplementary_Figure_2.pdf]
